# Supplementary material
Source: publisher figshare collection journal article supplement (https://acs.figshare.com/ndownloader/files/3597738)
Supplement: Supplementary file 1 [file 3597738]

Supporting Information

for

# Interaction of Nucleobases and Aromatic Amino Acids with Graphene oxide and Graphene Flakes

Hakkim Vovusha,<sup>1,2</sup>, Suparna Sanyal<sup>2</sup> and Biplab Sanyal<sup>1\*</sup>

<sup>1</sup>Department of Physics and Astronomy,  
Uppsala University,  
Box 516, 751 20,  
Uppsala, Sweden

<sup>2</sup>Department of Cell and Molecular Biology,  
Uppsala University,  
Box-596, BMC, 751 24,  
Uppsala, Sweden

\* Correspondence to: [biplab.sanyal@physics.uu.se](mailto:biplab.sanyal@physics.uu.se)

Table S1: Calculated binding energy (in kJ/mol) of G and GO with nucleobases and amino acids using M052X and M062X level of theory (BE is corrected with basis set super position error (BSSE)).

| Complex | M052X         |       | M062X       |       | M062X         |       |
|---------|---------------|-------|-------------|-------|---------------|-------|
|         | 6-311++G(d,p) |       | 6-31+G(d,p) |       | 6-311++G(d,p) |       |
|         | G             | GO    | G           | GO    | G             | GO    |
| A       | 16.70         | 30.88 | 52.19       | 46.92 | 44.23         | 43.53 |
| G       | 27.23         | 46.70 | 65.08       | 62.09 | 57.46         | 58.60 |
| T       | 19.64         | 28.27 | 52.93       | 42.96 | 46.23         | 39.06 |
| C       | 20.50         | 54.57 | 51.02       | 69.41 | 45.10         | 66.09 |
| U       | 13.93         | 33.06 | 46.36       | 48.66 | 35.00         | 45.47 |
| TYR     | 11.48         | 36.55 | 33.14       | 49.25 | 28.75         | 48.14 |
| TRP     | 16.34         | 40.69 | 45.11       | 48.61 | 38.62         | 46.70 |
| PHE     | 9.60          | 17.18 | 28.15       | 28.82 | 23.80         | 26.33 |
| HIS     | 10.35         | 85.73 | 25.23       | 93.52 | 21.81         | 92.81 |

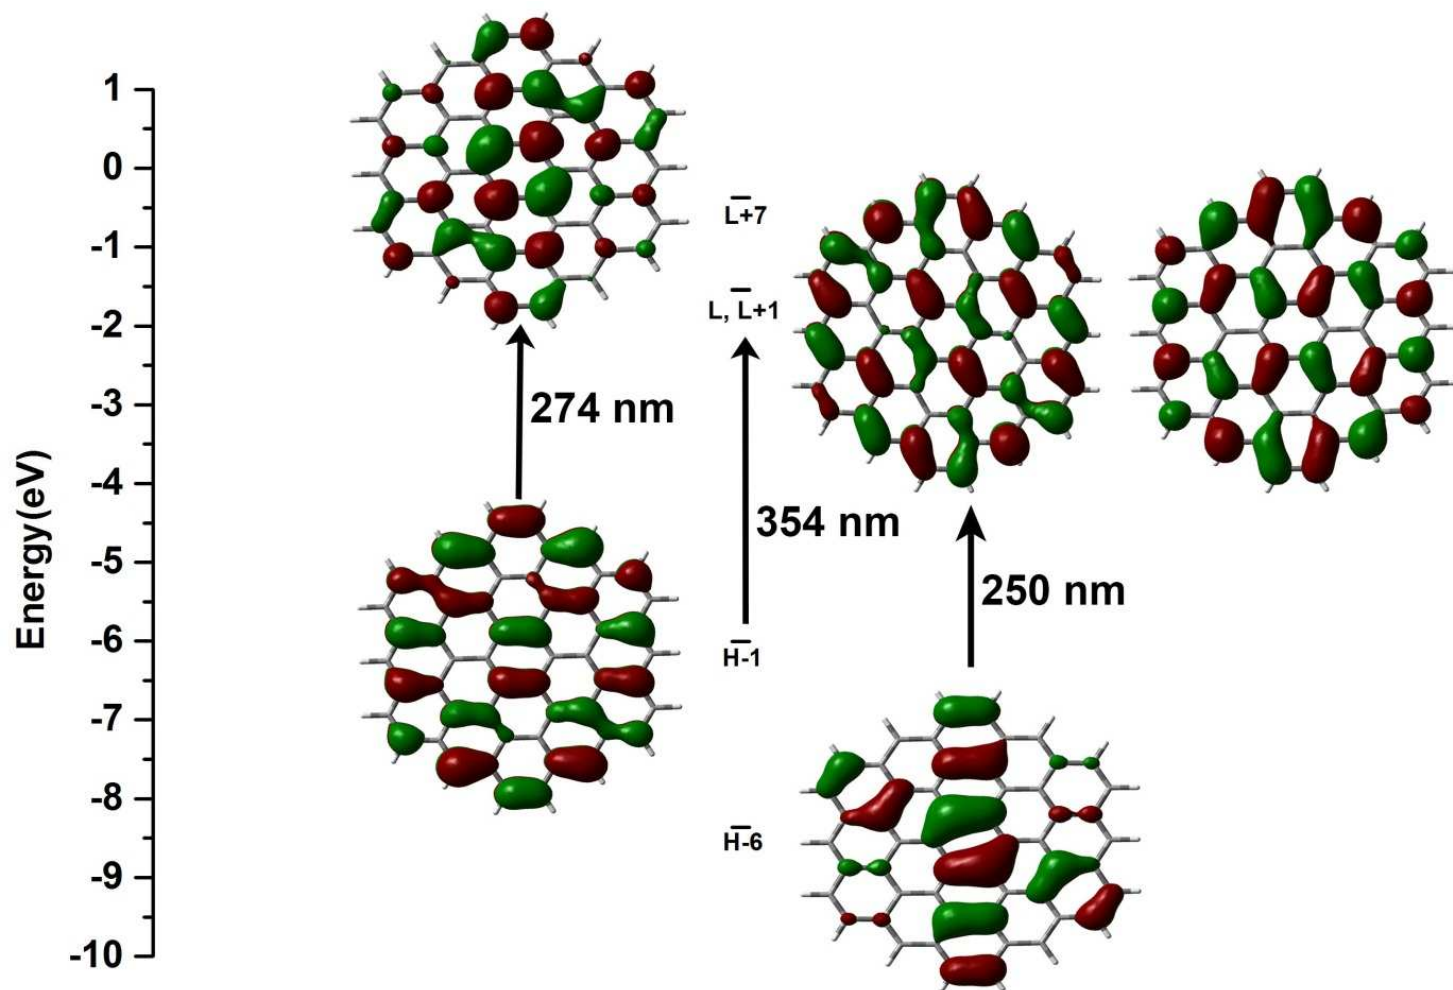

**Figure S1.** Frontier molecular orbitals involved in the vertical excitation of G flake.

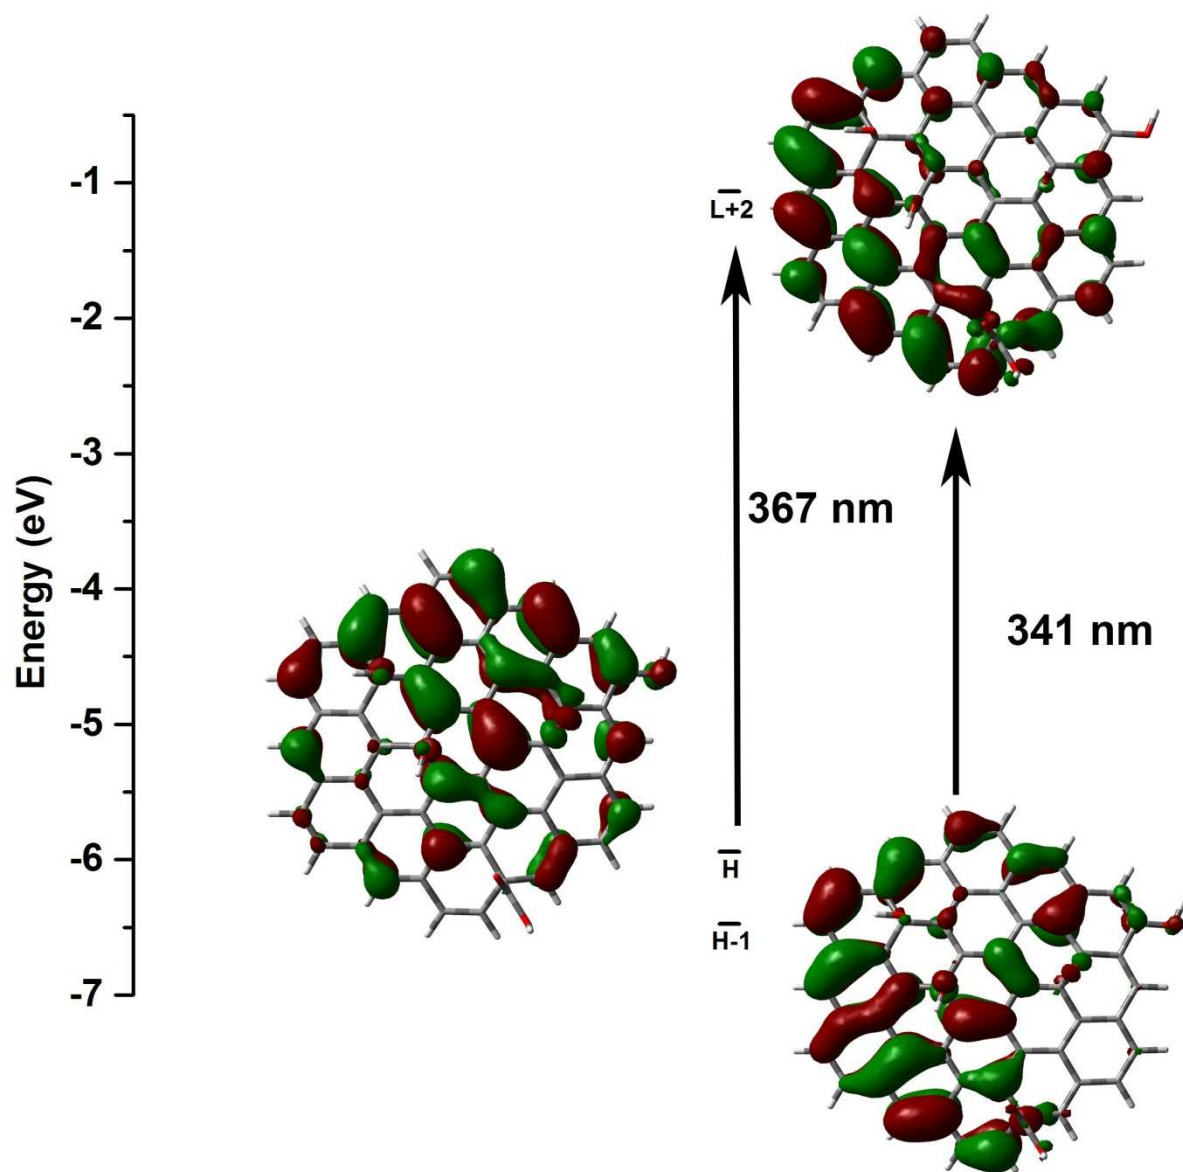

**Figure S2.** Frontier molecular orbitals involved in the vertical excitation of GO flake.

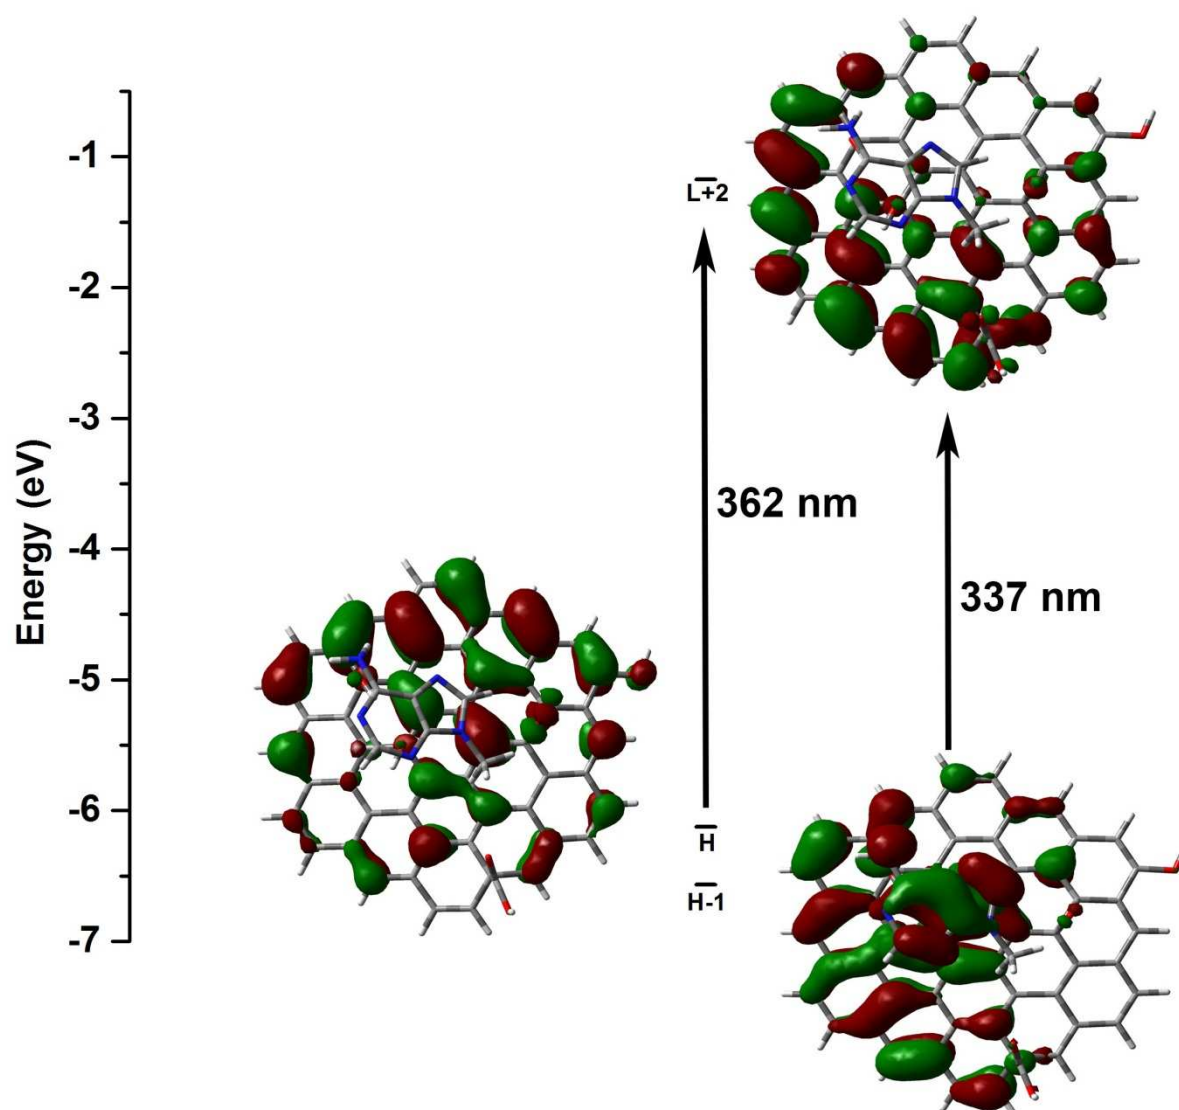

**Figure S3.** Frontier molecular orbitals involved in the vertical excitation of GO-A.

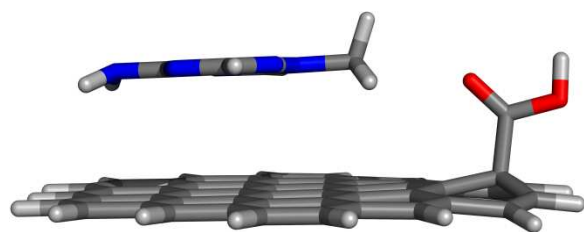

GO-A-CAR

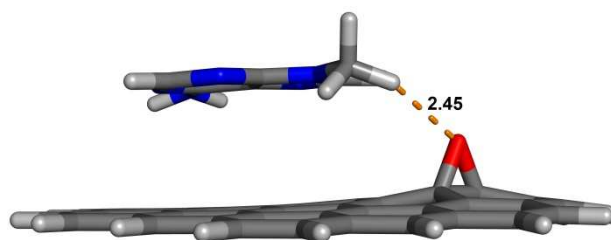

GO-A-EPO

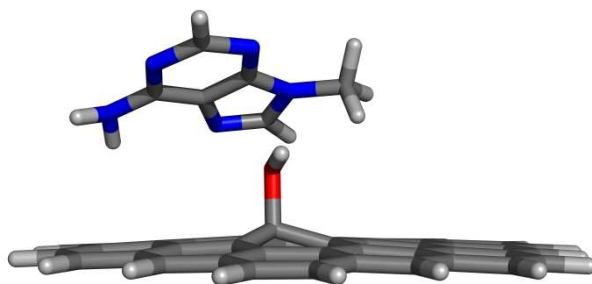

GO-A-OH

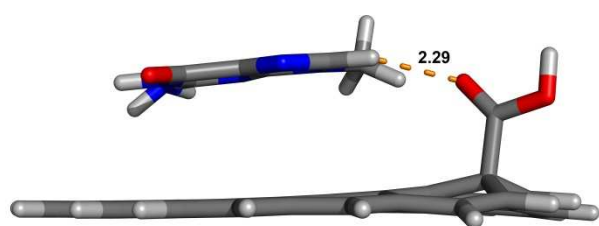

GO-G-CAR

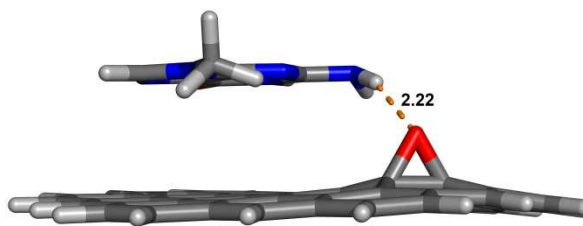

GO-G-EPO

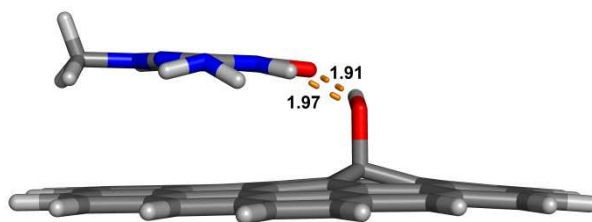

GO-G-OH

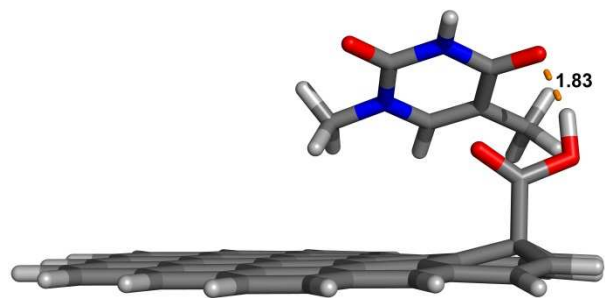

GO-T-CAR

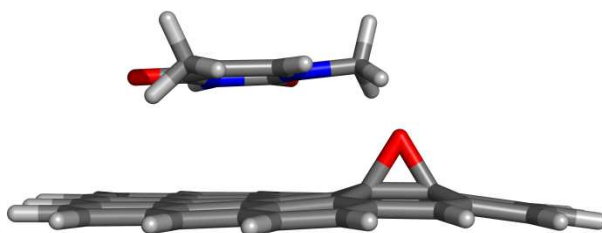

GO-T-EPO

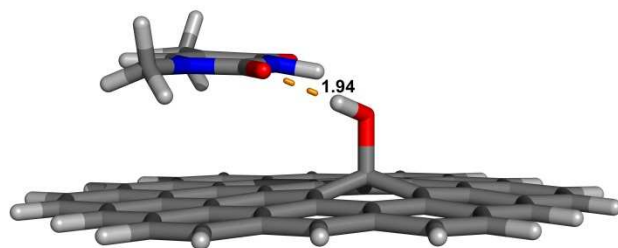

GO-T-OH

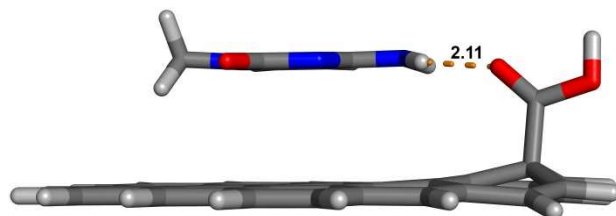

GO-C-CAR

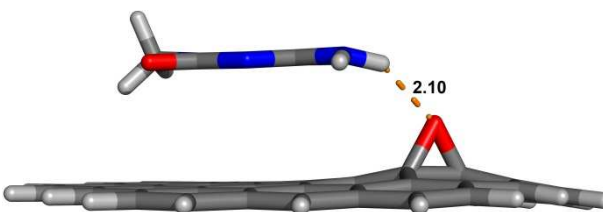

GO-C-EPO

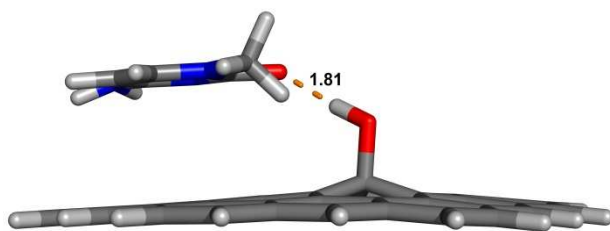

GO-C-OH

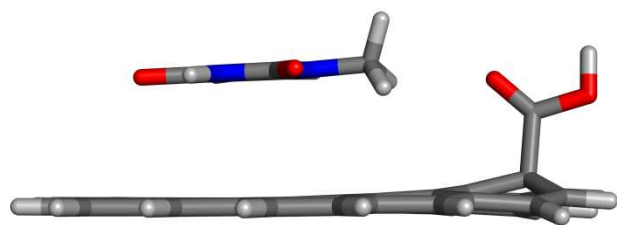

GO-U-CAR

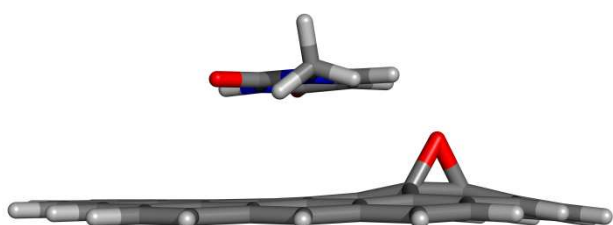

GO-U-EPO

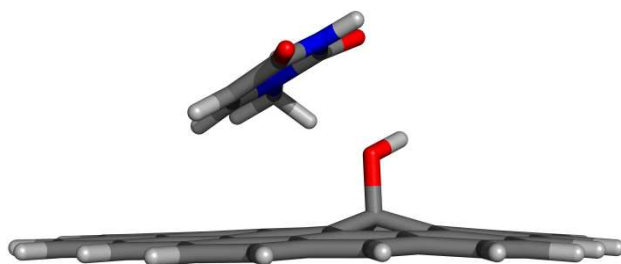

GO-U-OH

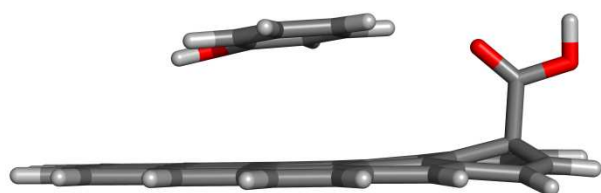

GO-Tyr-CAR

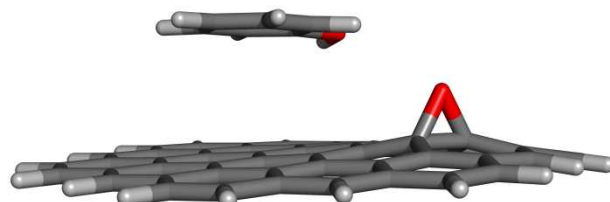

GO-Tyr-EPO

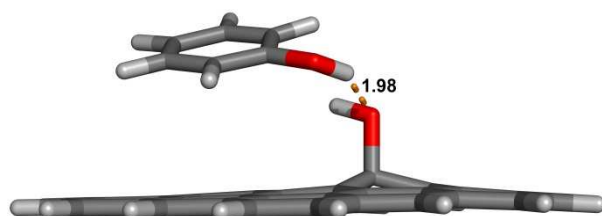

GO-Tyr-OH

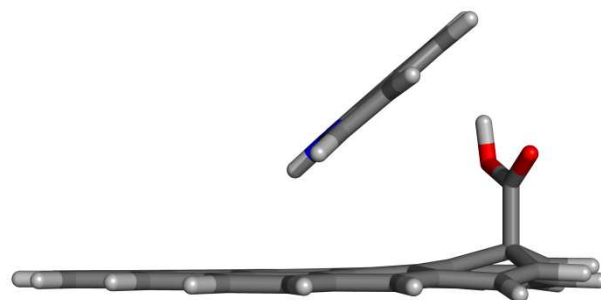

GO-Trp-CAR

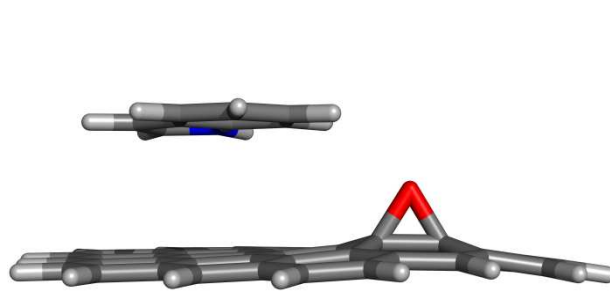

GO-Trp-EPO



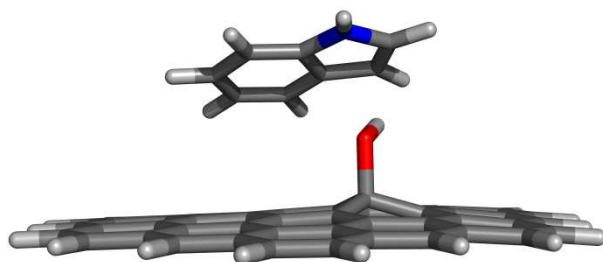

GO-Trp-OH

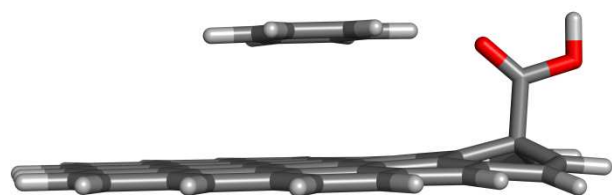

GO-Phe-CAR

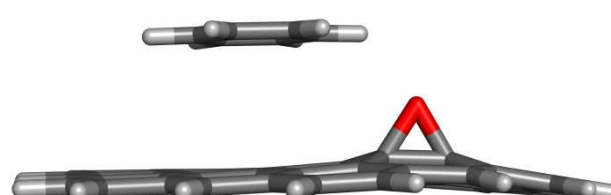

GO-Phe-EPO

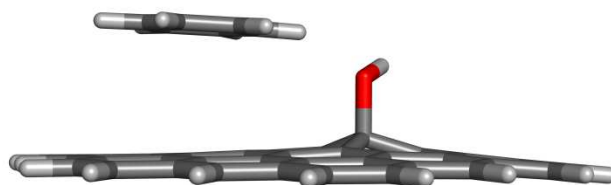

GO-Phe-OH

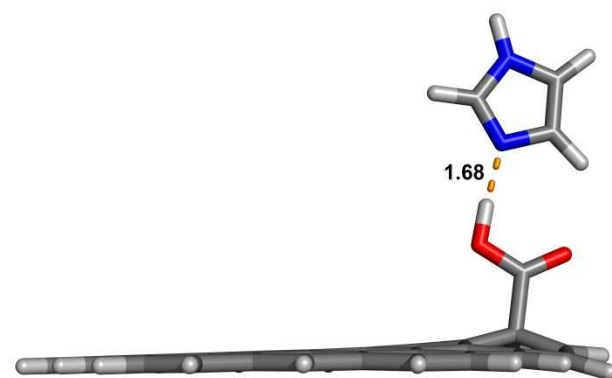

GO-His-CAR

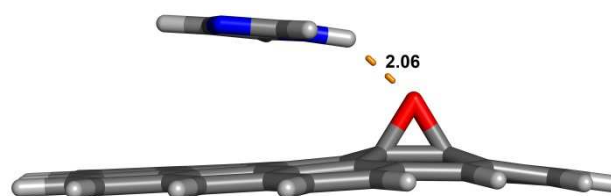

GO-His-EPO

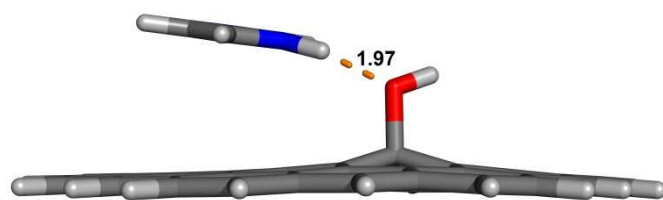

GO-His-OH

**Figure S4.** Optimized geometries (bond lengths in Å) of mono carboxyl or epoxy or hydroxy GO with DNA bases and aromatic amino acids using M05-2X/6-31G (d) level of theory.
